# Supplementary material for: Transdifferentiation and Proliferation in Two Distinct Hemocyte Lineages in Drosophila melanogaster Larvae after Wasp Infection
Source: PubMed Central journal article supplement (PMC4945071; doi:10.1371/journal.ppat.1005746), 2016-07-14
Supplement: ppat.1005746.s003.pdf [file ppat.1005746.s003.pdf]

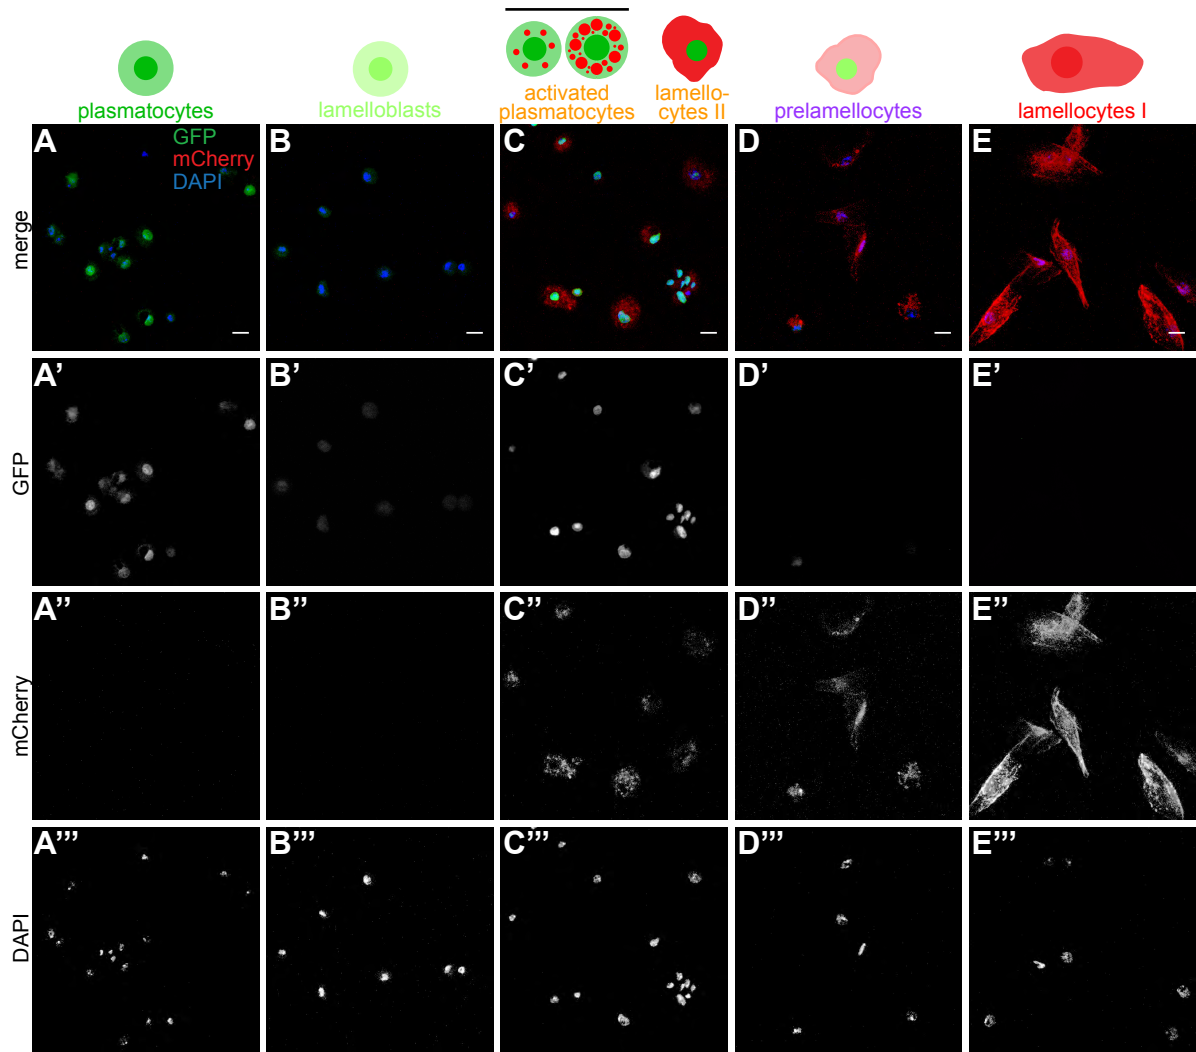

**S3 Fig. Images of hemocyte populations after cell sorting.** (A-A''') plasmatocytes, (B-B''') lamelloblasts, (C-C''') activated plasmatocytes and lamellocytes type II, (D-D''') prelamellocytes, and (E-E''') lamellocytes type I. All fluorescent channels and the merge are shown separately. Scale bars 10  $\mu\text{m}$ .
