# Supplementary material for: Transdifferentiation and Proliferation in Two Distinct Hemocyte Lineages in Drosophila melanogaster Larvae after Wasp Infection
Source: PubMed Central journal article supplement (PMC4945071; doi:10.1371/journal.ppat.1005746), 2016-07-14
Supplement: ppat.1005746.s007.pdf [file ppat.1005746.s007.pdf]

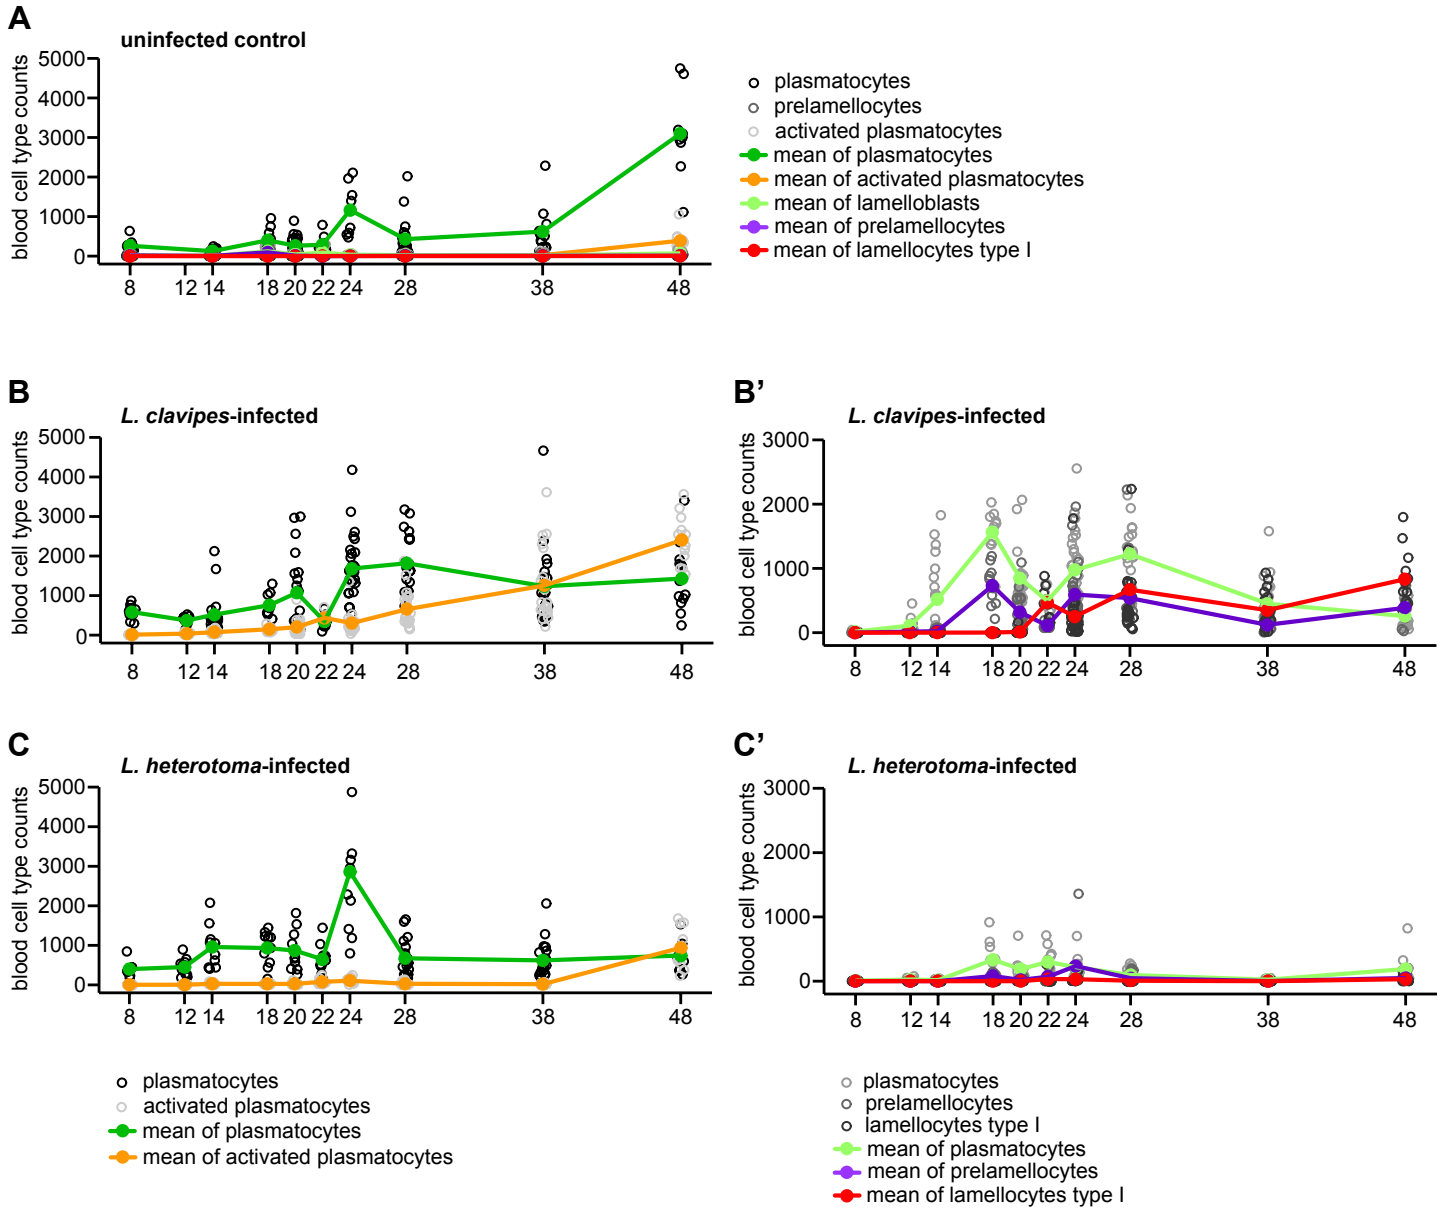

**S7 Fig. Timeline of circulating hemocyte counts of age-matched control as well as *L. clavipes*- and *L. heterotoma*-infected larvae.** (A) Counts of each hemocyte class of uninfected *Me/w* heterozygous larvae collected at the indicated time points, (B-B') counts of *Me/w* heterozygous larvae infected by *L. clavipes*, and (C-C') *L. heterotoma* hemocytes of at least ten individual larvae were counted. All cell types of *L. clavipes*-infected larvae followed a similar kinetics as after a *L. boulardi* infection. After a *L. heterotoma* infection however, the count of all cell types stayed low. Lamelloblasts, prelamellocytes, and lamellocytes developed, but were eradicated by the *L. heterotoma* venom.
