# Supplementary material for: Transdifferentiation and Proliferation in Two Distinct Hemocyte Lineages in Drosophila melanogaster Larvae after Wasp Infection
Source: PubMed Central journal article supplement (PMC4945071; doi:10.1371/journal.ppat.1005746), 2016-07-14
Supplement: ppat.1005746.s008.pdf [file ppat.1005746.s008.pdf]

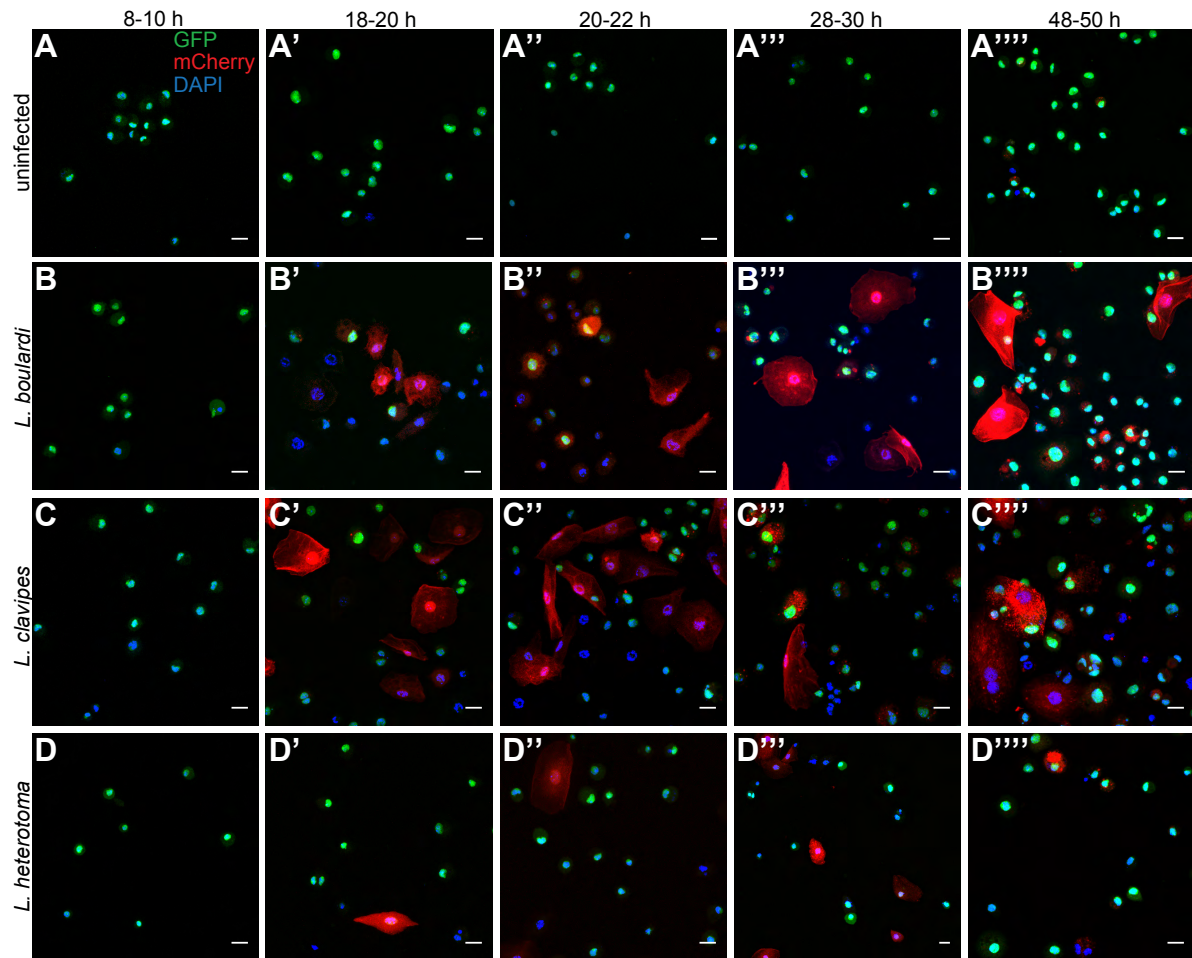

**S8 Fig. Images of circulating blood cells at representative time points after wasp infection.** (A-A''') Uninfected *Me/w*-larvae, larvae of the same genotype infected by (B-B''') *L. boulandi*, (C-C''') *L. clavipes*, or (D-D''') *L. heterotoma*. In uninfected larvae, plasmatocytes were the predominant blood cell type at all times. In *L. boulandi*- and *L. clavipes*-infected larvae, the first lamellocytes were seen in the circulation 18-20 h and 20-22 h after infection. At these time points, the mCherry expression was often very faint in comparison to later time points. *L. heterotoma*-infected larvae had only very few lamellocytes. Scale bars 50  $\mu\text{m}$ .
