# Supplementary material for: Transdifferentiation and Proliferation in Two Distinct Hemocyte Lineages in Drosophila melanogaster Larvae after Wasp Infection
Source: PubMed Central journal article supplement (PMC4945071; doi:10.1371/journal.ppat.1005746), 2016-07-14
Supplement: ppat.1005746.s011.pdf [file ppat.1005746.s011.pdf]

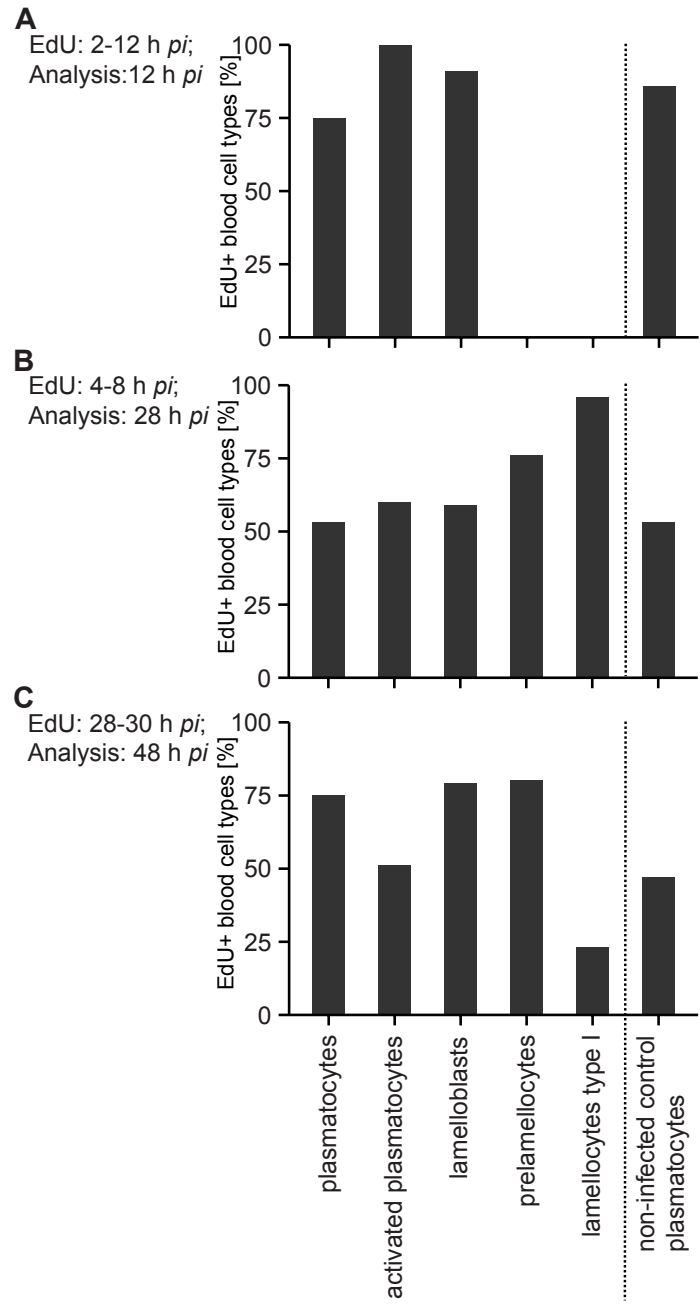

**S11 Fig. Quantification of EdU results.** (A-C) Quantification of different EdU experiments explained in the S10 Fig caption.
