# Supplementary material for: Transdifferentiation and Proliferation in Two Distinct Hemocyte Lineages in Drosophila melanogaster Larvae after Wasp Infection
Source: PubMed Central journal article supplement (PMC4945071; doi:10.1371/journal.ppat.1005746), 2016-07-14
Supplement: ppat.1005746.s013.pdf [file ppat.1005746.s013.pdf]

**S1 Table. Wasp species used in the study.**

| <b>Wasp species</b>           | <b>Strain</b> | <b>Source/Reference</b>     |
|-------------------------------|---------------|-----------------------------|
| <i>Leptopilina boulardi</i>   | <i>LbG486</i> | Yves Carton via Istvan Ando |
| <i>Leptopilina clavipes</i>   | <i>LcNet</i>  | Todd Schlenke               |
| <i>Leptopilina heterotoma</i> | <i>Lh14</i>   | Todd Schlenke               |
