# Supplementary material for: Transdifferentiation and Proliferation in Two Distinct Hemocyte Lineages in Drosophila melanogaster Larvae after Wasp Infection
Source: PubMed Central journal article supplement (PMC4945071; doi:10.1371/journal.ppat.1005746), 2016-07-14
Supplement: ppat.1005746.s014.pdf [file ppat.1005746.s014.pdf]

**S2 Table. Fly stocks used in the study.**

| Genotype                                        | Abbreviation               | Phenotype      | Citation/<br>Source |
|-------------------------------------------------|----------------------------|----------------|---------------------|
| <i>w<sup>1118</sup> iso</i>                     | <i>w</i>                   |                | [1]                 |
| <i>eater-GFP</i>                                | <i>eaterGFP</i>            | GFP            | [2]                 |
| <i>MSNF9MO-mCherry</i>                          | <i>msnCherry</i>           | mCherry        | [3]                 |
| <i>msnCherry,eaterGFP</i>                       | <i>Me</i>                  | mCherry, GFP   |                     |
| <i>eater-DsRed</i>                              | <i>eaterDsRed</i>          | DsRed          | [2]                 |
| <i>Hml<sup>Δ</sup>-GAL4</i>                     | <i>Hml<sup>Δ</sup>&gt;</i> |                | [4]                 |
| <i>msnCherry;eaterDsRed,Hml<sup>Δ</sup>&gt;</i> |                            | mCherry, DsRed |                     |
| <i>UAS-S/G2/M-Green</i>                         | <i>S/G2/M-Green</i>        | Green          | [5]                 |
| <i>He-GAL4</i>                                  | <i>He&gt;</i>              |                | [6]                 |
| <i>UAS-edin</i>                                 | <i>edin</i>                |                | [7]                 |
| <i>UAS-edin<sup>KK109528</sup></i>              | <i>edin<sup>KK</sup></i>   |                | VDRRC               |
| <i>Me;edin<sup>KK</sup></i>                     |                            |                | [8]                 |
| <i>Me;Fb-GAL4</i>                               | <i>Me;Fb&gt;</i>           |                | [8]                 |

**References for S2 Table**

1. Ryder E, Blows F, Ashburner M, Bautista-Llacer R, Coulson D, Drummond J, et al. The DrosDel collection: a set of P-element insertions for generating custom chromosomal aberrations in *Drosophila melanogaster*. *Genetics*. 2004; 167: 797-813. doi: 10.1534/genetics.104.026658
2. Kroeger PT, Jr., Tokusumi T, Schulz RA. Transcriptional regulation of *eater* gene expression in *Drosophila* blood cells. *Genesis*. 2012; 50: 41-49. doi: 10.1002/dvg.20787
3. Tokusumi T, Sorrentino RP, Russell M, Ferrarese R, Govind S, Schulz RA. Characterization of a lamellocyte transcriptional enhancer located within the *misshapen* gene of *Drosophila melanogaster*. *PLoS One*. 2009; 4: e6429. doi: 10.1371/journal.pone.0006429
4. Sinenko SA, Mathey-Prevot B. Increased expression of *Drosophila* tetraspanin, Tsp68C, suppresses the abnormal proliferation of ytr-deficient and Ras/Raf-activated hemocytes. *Oncogene*. 2004; 23: 9120-9128. doi: 10.1038/sj.onc.1208156
5. Nakajima Y, Kuranaga E, Sugimura K, Miyawaki A, Miura M. Nonautonomous apoptosis is triggered by local cell cycle progression during epithelial replacement in *Drosophila*. *Mol Cell Biol*. 2011; 31: 2499-2512. doi: 10.1128/MCB.01046-10
6. Zettervall CJ, Anderl I, Williams MJ, Palmer R, Kurucz E, Ando I, et al. A directed screen for genes involved in *Drosophila* blood cell activation. *Proc Natl Acad Sci USA*. 2004; 101: 14192-14197. doi: 10.1073/pnas.0403789101
7. Vanha-aho LM, Kleino A, Kaustio M, Ulvila J, Wilke B, Hultmark D, et al. Functional characterization of the infection-inducible peptide Edin in *Drosophila melanogaster*. *PLoS One*. 2012; 7: e37153. doi: 10.1371/journal.pone.0037153
8. Vanha-aho LM, Anderl I, Vesala L, Hultmark D, Valanne S, Rämetsä M. *Edin* expression in the fat body is required in the defense against parasitic wasps in *Drosophila melanogaster*. *PLoS Pathog*. 2015; 11: e1004895. doi: 10.1371/journal.ppat.1004895
